# Supplementary material for: A Novel Human Polycomb Binding Site Acts As a Functional Polycomb Response Element in Drosophila
Source: PLOS journal article supplement (doi:10.1371/journal.pone.0036365), 2012-05-03

**Figure S1**

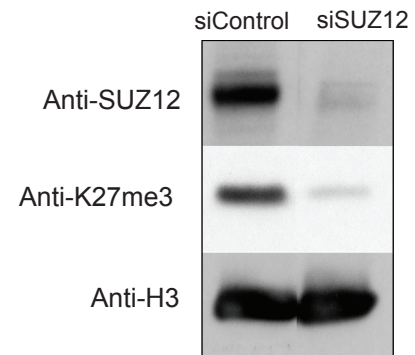

Supplement: S1 (10.1371/journal.pone.0036365.s001) [file journal.pone.0036365.s001]
